# Supplementary material for: Regulation of Angiogenic Functions by Angiopoietins through Calcium-Dependent Signaling Pathways
Source: PubMed Central journal article supplement (PMC4471310; doi:10.1155/2015/965271), 2015-06-04
Supplement: 965271.f1.pdf [file 965271.f1.pdf]

## **Supplementary Materials and Methods**

### **Flow cytometric assessment of cell proliferation**

Cell cultured in EGM-2 as monolayer were stimulated with 100ng/ml Ang-1 or 200ng/ml Ang-2 for 24h. Cells were harvested by trypsin/EDTA (Sigma), rinsed with PBS+1%BSA (Sigma) and incubated with 2µg/ml propidium iodide (PI, Sigma) plus 0,1 U/L of RNase. Stimulated and unstimulated cells were then counted in a Coulter Epics XL flow cytometer (Beckman Coulter) and data were analyzed using FCS3 express Software (De Novo Software).

**Figure S1**

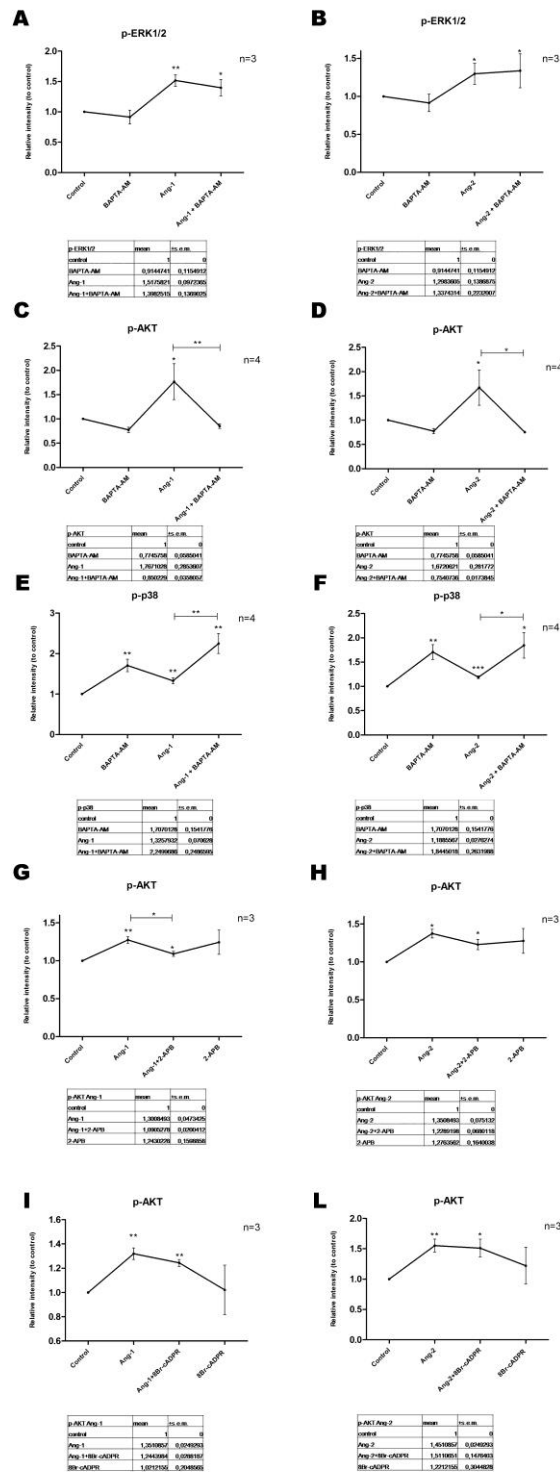

**Figure S1: Quantification of calcium-dependent AKT and MAPK activation upon Ang-1/Ang-2 stimulation**

Densitometric quantification of Western blots showing levels of p-ERK1/2/ $\beta$  actin, p-AKT/ $\beta$  actin, p-p38/ $\beta$  actin versus control (vehicle, set as 1) in the culture conditions detailed in the legend to Fig.5. Data are expressed as mean  $\pm$  s.e.m. from at least three independent experiments. Student's *t*-test was used for statistical comparison between means. \* $p < 0.05$ , \*\* $p < 0.01$ , \*\*\* $p < 0.001$ .

**Figure S2**

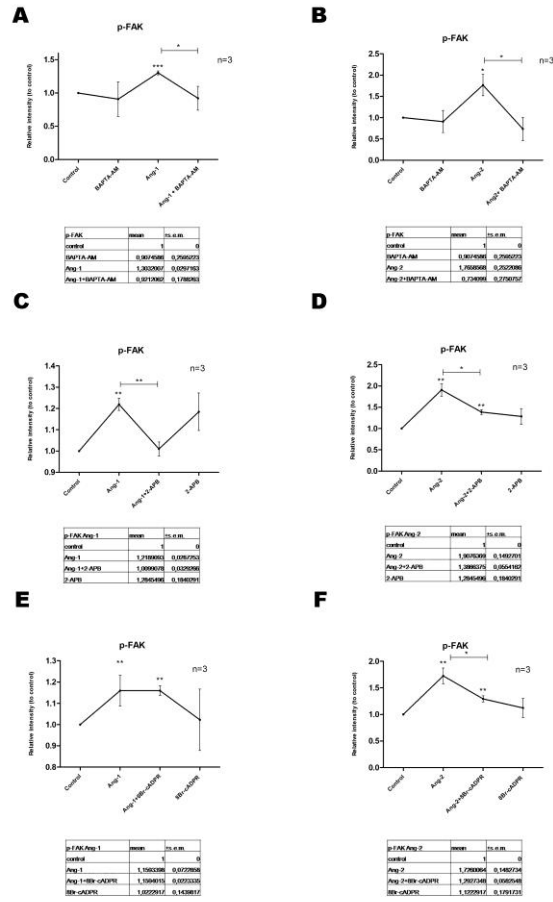

**Figure S2: Quantification of calcium-dependent FAK activation upon Ang-1 and Ang-2 stimulation**

Densitometric quantification of Western blots showing levels of p-FAK/ $\beta$  actin versus control (vehicle, set as 1) in the culture conditions detailed in the legend to Fig 6 A,B1-C2. Data are expressed as mean  $\pm$  s.e.m. from at least three independent experiments. Student's *t*-test was used for statistical comparison between means. \* $p < 0.05$ , \*\* $p < 0.01$ , \*\*\* $p < 0.001$ .

**Figure S3**

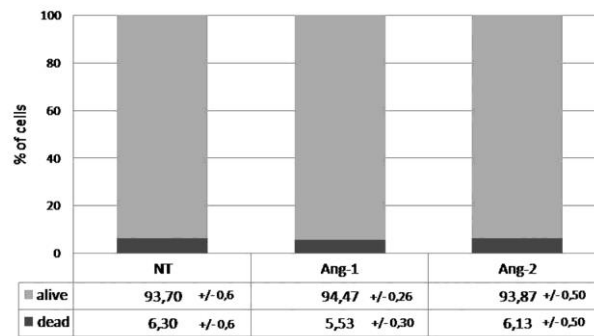

**Figure S3: Angs treatment fails to stimulate cell proliferation**

The proliferative response of HUVECs to stimulation with 100ng/ml Ang-1 or 200ng/ml Ang-2 for 24 h, was tested by flow cytometry using propidium iodide. The percentage of live and dead cells in stimulated and control (NT) conditions are shown. Values in table represent the mean  $\pm$ s.e.m. from three independent experiments.
